# Supplementary material
Source: ML conference proceedings conference paper supplement (https://openreview.net/forum?id=gP4aAi7q8S)
Supplement: supplementary_material [file attachment]

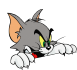

# **CausalChaos! Dataset for Comprehensive Causal Action Question Answering Over Longer Causal Chains Grounded in Dynamic Visual Scenes**

## **Appendix/Supplementary Material**

Anonymous Author(s)

Affiliation

Address

email

### **A Appendix / supplemental material**

We have provided the Appendix (a **PDF file** + **PowerPoint presentation**). Alternatively, Appendix can be obtained from here: <https://drive.google.com/drive/folders/1TytAcmDw11fbSCtKD1SWFoLeZyC6fg0X?usp=sharing>. This is with the permission of Chairs.

#### **Contents**

1. Extended related work **subsection A.1**
2. Implementation details **subsection A.2**
3. Details regarding MIST-CC **subsection A.3**
4. Annotators' background **subsection A.4**
5. Dynamic scene linking **subsection A.5**
6. Full-size Tables and Figures **subsection A.6**
7. Dataset Stats and Examples **subsection A.7**
8. Wordclouds **subsection A.8**
9. Value in Multi-level answers to Why-questions **subsection A.9**
10. Causal chain details and examples **subsection A.10**
11. Further details on causal chain length comparison experiment **subsection A.11**
12. Details on Types of Reasoning **subsection A.12**
13. Extended analysis of models' performance **subsection A.13**
14. Discussion on cartoon physics **subsection A.14**
15. CausalConfusion Negative Generation **subsection A.15**
16. CapsMIX extended details **subsection A.16**
17. Negative societal impact **subsection A.17**
18. Compute details **subsection A.18**
19. Link to dataset **subsection A.19**

## 25 A.1 Extended Related Work

### 26 A.1.1 Datasets/Benchmarks

27 To drive the progress in Video QA, researchers have developed various datasets with distinct focuses  
28 and contributions. In the following, we will delve into the landscape of Video QA datasets, examining  
29 their characteristics, limitations, and the specific areas they address.

30 *Early Video QA Datasets.* During the early stages of Video QA research, several datasets relied  
31 on video captions or descriptions to automatically generate questions and corresponding answers.  
32 Examples of these datasets include *MovieFIB* [15], *MSVD-QA* [20], *MSRVTT-QA* [20], *YouTube2Text*  
33 [6], *open-ended QA*, *Zeng et al.*, and *Video Context-QA*[26]. These datasets played a crucial role in  
34 the initial exploration of Video QA but were primarily limited to object and action recognition. They  
35 lacked the ability to go beyond these basic visual cues, which posed limitations in understanding  
36 complex interactions and causal relationships within videos.

37 *TGIF-QA* [7, 8] focuses on short videos and relies on captions to generate questions and answers,  
38 but it is limited in its coverage of object interactions and causal reasoning. On the other hand,  
39 *ActivityNet-QA* [23] annotates longer web videos, offering a broader range of content, but it also  
40 lacks in capturing complex reasoning. Both datasets fall short in capturing the depth and complexity  
41 required for comprehensive video question answering; they did not fully explore questions and  
42 answers involving object interactions and causal relationships.

43 The *Social-IQ* [24] dataset is designed to address questions related to human social behavior in videos,  
44 relying on multimodal cues for answering. This dataset emphasizes the importance of understanding  
45 social interactions and dynamics within video content. By focusing on human behavior, Social-IQ  
46 offers a unique perspective in video question answering. However, it should be noted that this dataset  
47 primarily relies on multimodal cues, meaning that the answers to the questions heavily depend on  
48 the combination of visual and other sensory information, and as such cannot be used as a visual  
49 reasoning dataset. While it provides valuable insights into social aspects of video content, the dataset  
50 may not fully capture the broader context and reasoning required for comprehensive video question  
51 answering.

52 *CLEVRER* [22] dataset covers temporal and causal relationships using collision events between  
53 various objects. Being limited to simple, inanimate objects and collision events, it does not cover  
54 reasoning involving emotions and intentions; objects do not have any characteristics; actions do  
55 not have motivation or rationale; limited set of events; scene does not have an actually involved  
56 background; character-object interaction is lacking. Moreover, the reasoning is over a shorter  
57 temporal horizon than ours. Since it is a synthetic dataset with programmatically generated QA pairs,  
58 there is also a lack of diversity in natural language descriptions of the events and human judgments.  
59 *CLEVRER-Humans* [17] bridges this language gap, but, other shortcomings still persist.

60 *AGQA* [5] focuses on spatio-temporal scene understanding. For example, Did they <action1> or  
61 <action2>for longer? What did the person do after <action>? What were they <action> first/last?  
62 *STAR*, a situation reasoning dataset, additionally, covers prediction and feasibility questions. However,  
63 they do not cover explanatory “why” questions like ours.

64 We have discussed and compared with *NextQA* [19], *CausalVidQA* [11], *IntentQA* [13] in detail in  
65 the main paper. Here we provide some additional details on them. *NextQA* [19] contains descriptive  
66 (related to location, counting, yes/no), temporal (related to temporal ordering previous, next), and  
67 causal questions. *CausalVidQA* [11] contains descriptive, causal, predictive, and counterfactual.  
68 While they provide a rationale for predictive and counterfactual, they do not explore and provide multi-  
69 level answers and explanations for Why-questions, while our dataset does provide them. *IntentQA*  
70 [13], a concurrent dataset explores understanding motivations based on context. Their dataset is  
71 derived from *NextQA* causal and temporal questions, but they construct their dataset in a contrastive  
72 manner such that the same actions under different contexts lead to different underlying intents.

### 73 A.1.2 Models

74 In the following, we have discussed the state-of-the-art VideoQA models that we have benchmarked  
75 on VisCAQA dataset in the main paper. We have discussed their central concepts and unique design  
76 characteristics.

- 77 • *BlindQA* [1]. In this approach, no visual information is leveraged. Answers are chosen  
78 directly based on the questions. In a nutshell, this model learns a mapping from question to  
79 answer. Higher performance by method would suggest that the dataset contains questions  
80 that are not visually-grounded.
- 81 • *EVQA* [1]. This method extends BlindQA baseline by incorporating the visual stream  
82 modeled by an LSTM.
- 83 • *Spatio-Temporal Reasoning in Visual Question Answering (STVQA)* [7]. This work intro-  
84 duces three novel video QA tasks that demand spatio-temporal reasoning skills to answer  
85 questions accurately. In addition, a new TGIF-QA dataset has been created to facilitate  
86 research in this field. To address this issue, a dual-LSTM-based approach with both spatial  
87 and temporal attention mechanisms has been proposed as a baseline model.
- 88 • *Motion-Appearance Co-Memory Networks (CoMem)* [4]. A novel Video QA framework,  
89 combining Dynamic Memory Network (DMN) principles with motion and appearance  
90 features. This innovative approach leverages a co-memory attention mechanism to incor-  
91 porate both motion and appearance cues. It employs a temporal conv-deconv network to  
92 create multi-level contextual information and utilizes a dynamic fact ensemble method for  
93 constructing dynamic temporal representations tailored to specific questions.
- 94 • *Heterogeneous Memory Enhanced Multimodal Attention Model (HME)* [2]. This innovative  
95 end-to-end trainable Video QA framework begins by generating global context-aware visual  
96 and textual features. It achieves this by interacting the current inputs with memory contents.  
97 Subsequently, it integrates these multimodal features through attentional fusion to make  
98 accurate inferences for answering questions.
- 99 • *HCRN* [10]. This is a hierarchical framework with conditional relation networks as building  
100 blocks models input video at multiple scales (clip-, full video-level) in a cascaded manner.  
101 Visual features at each level are conditioned on the question features. The joint representation  
102 is fed into the classifier for answer prediction.
- 103 • *HGA* [9]. Leverages heterogeneous graph reasoning module and a co-attention unit to  
104 capture the local and global correlations between video clips, linguistic concepts and their  
105 cross-modal correspondences.
- 106 • *Multimodal Iterative Spatial-temporal Transformer (MIST)* [3]. MIST, designed for long-  
107 form Video Question Answering (VideoQA), revolutionizes conventional dense spatial-  
108 temporal self-attention. It accomplishes this by utilizing two critical modules: segment and  
109 region selection, which adaptively pick out frames and image regions tied to the questions.  
110 Following this, it processes diverse visual concepts effectively with an attention mechanism.  
111 This process occurs iteratively across multiple layers, empowering the model with multi-  
112 event reasoning capabilities.

## 113 A.2 Implementation details

114 We use the publicly available github code repository: <https://github.com/doc-doc/NExT-QA>  
115 for BlindQA, EVQA, CoMem, HME, HCRN, and HGA.

## 116 A.3 Details regarding MIST-CC

117 We design MIST-CC, a multitask version of MIST that learns to generate causal chains as an  
118 auxiliary task. With MIST-CC, our goal is not to generate perfect causal chains during testing, per  
119 se; but to focus on providing guiding signal to the model to improve the performance on question-  
120 answering task. Framework for MIST-CC is shown in Figure 1. We build upon the publicly available  
121 implementation of MIST. We implement the Causal Chain Generator in our MIST-CC framework  
122 using a single-layer gated recurrent unit (GRU) with a 1024-dimensional hidden state; and dropout  
123 rate of 0.2. The overall multitask (MTL) objective function to be minimized is the summation of: 1)  
124 multichoice question answering loss ( $\mathcal{L}_{MCQA}$ ); 2) causal chain generation loss ( $\mathcal{L}_{CCG}$ ) (Equation 1).  
125 We set  $\alpha$  to 1. To obtain vanilla MIST, we set  $\beta$  to 0; while to obtain MIST-CC, we set  $\beta$  to 0.1. We  
126 use ADAM optimizer with an initial learning rate of 1e-4. We do not use learning rate schedulers.  
127 All the models are trained for 30 epochs, and the best version of a model is selected based on the  
128 performance on the validation set.

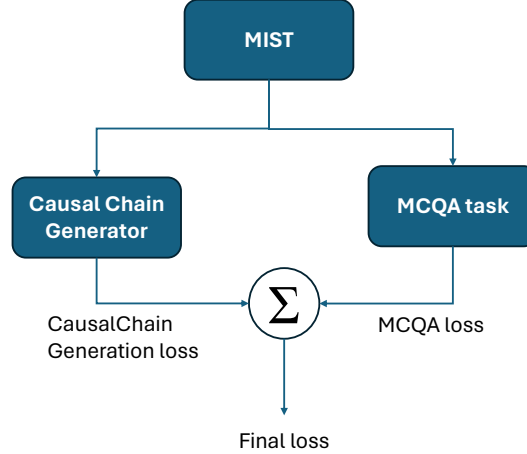

Figure 1: MIST-CC framework.

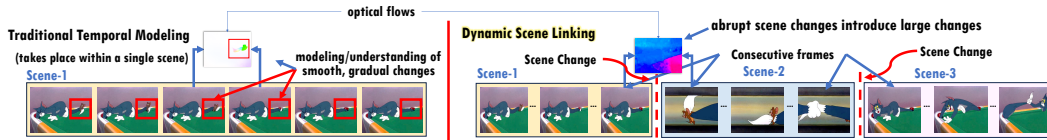

Figure 2: **Challenge of dynamic scene linking.** Here we have shown temporal modeling or understanding in a traditional sense; and compared it with dynamic scene linking. Our full causal chain for this particular example consisted of three scenes. In traditional temporal modeling, typically the dependencies are modeled over gradual transitions—typically, within a single scene. Notice the optical flow from traditional temporal modeling where Jerry is going into a pool table hole. On the other hand, notice the abrupt scene change, which causes disruption in visual flow, resulting in large amplitude and widespread optical flow. We have used optical flow as one way to illustrate the magnitude of change (but other measures may also be used).

$$\mathcal{L}_{MTL} = \alpha \mathcal{L}_{MCQA} + \beta \mathcal{L}_{CCG} \quad (1)$$

#### 129 A.4 Annotators’ Background

130 Five undergraduate students from computer science and electrical engineering disciplines were  
 131 recruited as annotators. All the annotators listed at least Fluency as the English language skills level.

#### 132 A.5 Dynamic Scene Linking

133 Our CausalChaos dataset involves more abrupt/frequent scene (event) changes than existing causal  
 134 video QA datasets. Causal links or clues needed to solve causal relationships in QA pairs in our  
 135 dataset are embedded in different scenes/events. Thus, video QA models must link these scenes/events  
 136 together to understand the story. We term this problem Dynamic Scene Linking. In the following, we  
 137 briefly discuss a related problem of temporal modelling and differentiate Dynamic Scene Linking  
 138 from it. Although humans can seamlessly link such scenes, dynamic scene linking introduces a novel  
 139 challenge for video understanding models in addition to temporal modelling.

140 Temporal modelling or understanding in video understanding generally refers to the process of  
 141 analyzing and interpreting the temporal dynamics or changes within a sequence of frames in a  
 142 video—typically within a single scene (refer to Figure 2). This involves capturing and understanding  
 143 the patterns of motion, action, and context over time. Temporal modeling techniques aim to extract  
 144 meaningful information from the temporal dimension of video data.

145 In the traditional sense, temporal modelling involves techniques that capture the gradual changes  
 146 and transitions occurring within a video sequence. This includes methods like optical flow and 3D



convolutional neural networks. These techniques are designed to capture the temporal dependencies and patterns of continuity or gradual evolution in videos.

On the other hand, abrupt scenes or shot changes, such as those found in cartoons like Tom and Jerry, represent sudden and significant shifts in the content or context of a video, however, these changes are causally linked. These changes can include shifts in location, characters, actions, or camera perspectives. Unlike gradual temporal changes, abrupt changes occur rapidly and may disrupt the continuity of the narrative or visual flow. While temporal understanding typically involves linking very nearby dependencies, dynamic scene linking involves linking across abrupt scene changes. For example, in **Figure 2**, in Scene-2, some of the things the model needs to be able to understand are: 1) the thing that Jerry is carrying is Tom's tail from its partial observation; 2) white furry hand is of Tom. Implicit causal reasoning plays a crucial role in establishing continuity between scenes, even when objects are seen partially or there are view changes. By relying on their understanding of cause-and-effect relationships within the narrative, humans can seamlessly integrate partial views and view changes into their mental model of the story. Similarly, models are required to do implicit causal reasoning for dynamic scene linking, and can benefit from incorporating capabilities such as forming a mental 'world model' of the story.

Temporal modeling techniques in the context of abrupt scene changes need to be able to detect and handle these sudden transitions effectively. While some traditional temporal modeling methods may capture gradual changes well, they might struggle to handle abrupt changes efficiently. Specialized algorithms or models may be required to identify and adapt to such abrupt scene changes.

## A.6 Full-size Tables and Figures

**Examples from CausalChaos! dataset.** For easier viewing, we have provided dataset video examples from **Figure 1 from the main paper** in the [accompanying PowerPoint presentation](#).

**CausalChaos! vs NextQA dataset.** For easier viewing, we have provided dataset video examples from **Figure 2(c) from the main paper** in the [accompanying PowerPoint presentation](#).

## A.7 Further Dataset Stats and Examples

### Dataset Stats:

- Average clip length : 357.95 frames
- Longest of clips : 2315.0 frames
- Average length of question : 6.54 words
- Longest length question : 17 words
- Longest question : Why did Jerry and Tuffy put the wire into the water and turn on the freeze mode?
- Average length of Answer : 7.76 words
- Longest length Answer : 26 words
- Longest Answer : Tom saw his tail and hind legs at the top of the pipe while Tom's head and front legs were at the bottom of the pipe.
- Average length of Explanation: 13.88 words
- Longest length Explanation: 30 words
- Longest Explanation: Tom thought Jerry would walk into the hole and into Tom's mouth but Jerry let the toy mouse go first and Tom ate the toy mouse thinking it was Jerry.

**Dataset examples.** For easier viewing of the videos, we have provided them in the [accompanying PowerPoint presentation](#).

## A.8 Wordclouds

Wordclouds are illustrated in **Figure 3**.

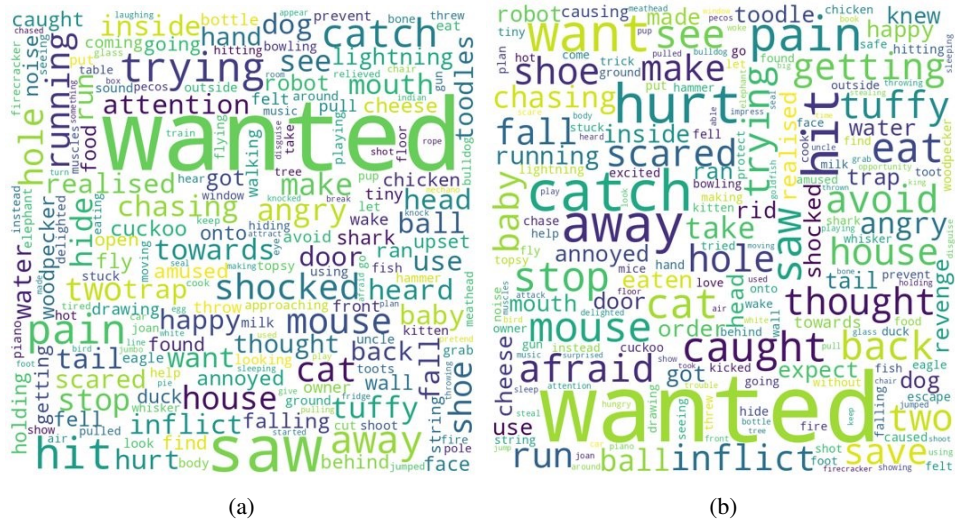

## A.9 Value in Multi-level Answers to Why-Questions

We richly annotate our dataset with multi-level answers to "Why"-questions behind the actions of characters in the Tom and Jerry cartoon. In this section, we discuss why and how a significant value lies in providing multi-level answers to "why" questions (or exploring various layers of causality or explanation) regarding characters' actions (or, in general life, people's actions). "Why" questions do not always have simple, straightforward answers—they often involve multiple layers of explanation and understanding. *In our dataset, we consider cartoon characters and their actions, but here for more generality, we take human behavior as a case for discussion.* Human behavior is typically multifaceted, influenced by a variety of factors including personal experiences, emotions, social context, cultural background, cognitive processes, etc.

There can be multiple layers of rationale behind any action or decision. For example, someone might choose to volunteer at a homeless shelter. On the surface, the reason may seem obvious – to help those in need. But delving deeper, you might find additional motivations such as personal fulfillment, a desire to contribute to the community, religious beliefs, or even social pressure from peers.

Recognizing the complexity of human behavior and understanding that there can be multiple, intertwined reasons for why people act the way they do is essential for empathy, effective communication, and building strong interpersonal relationships. Some of the ways multi-level answers to 'Why'-questions help are as follows:

- **Understanding Motivations:** At the surface level, a person's actions may seem straightforward, but delving deeper can reveal the underlying motivations and intentions driving those actions. Multi-level answers can help uncover these motivations, providing a more comprehensive understanding of human behavior.
- **Contextual Understanding:** Human behavior is complex and influenced by a variety of factors, including personal experiences, societal norms, cultural background, and psychological factors. Providing multi-level answers allows for a more nuanced understanding of the context in which the behavior occurs, shedding light on the various influences at play.
- **Predictive Insights:** By understanding the multiple layers behind people's actions, it becomes easier to predict future behavior. Recognizing patterns in motivations and behaviors can help anticipate how individuals might act in different situations, enabling better decision-making and planning.
- **Empathy and Compassion:** Exploring the deeper reasons behind someone's actions fosters empathy and compassion. It allows us to see beyond the surface behavior and understand the person's perspective, experiences, and struggles, leading to more meaningful interactions and relationships. While this might be more of a human experience-related factor and might

226 be limited to very specialized machines like empathetic robots, but still shows potentially  
227 how multi-level answers help.

- 228 • Problem Solving and Conflict Resolution: In situations where conflicts arise or problems  
229 need to be addressed, understanding the multi-level reasons behind people’s actions can  
230 facilitate more effective problem-solving and conflict-resolution strategies. It enables  
231 individuals to address underlying issues rather than just surface-level symptoms.

232 Overall, providing multi-level answers to “why” questions behind people’s actions enhances our  
233 understanding of human behavior, promotes empathy and compassion, and facilitates better decision-  
234 making and problem-solving.

## 235 A.10 CausalChain Details and Examples

236 In the following, we have provided some examples from our dataset to illustrate causal chains of  
237 different lengths. Note that, answer and explanation were combined when computing the length of  
238 causal chains.

Question: Why did Jerry slide?

Answer+Explanation: Jerry slid down the clock because he saw Spike trying to catch Tom and was confident that Spike’s attention was on Tom and not Jerry.

239 *Length of causal chain: 2.* In the given event involving Jerry, Spike, Tom, and a clock, we can identify  
240 several causal relationships that form a chain of events. Let’s break it down:

- 241 1. Event A: Jerry sees Spike trying to catch Tom.
- 242 2. Event B: Jerry is confident that Spike’s attention is on Tom.
- 243 3. Event C: Jerry slides down the clock.

244 Now, let’s consider the causal relationships:

- 245 • Event A causes Jerry’s perception of Spike’s actions.
- 246 • Event B is influenced by Jerry’s perception of Spike’s actions.
- 247 • Event B causes Jerry’s confidence in Spike’s attention being on Tom.
- 248 • Event C is influenced by Jerry’s confidence in Spike’s attention.

249 So, we can identify at least two causal links or events in this scenario. Each event contributes to the  
250 next in a causal chain, leading to the final action of Jerry sliding down the clock.

Question: Why did Jerry go below chicken?

Answer+Explanation: Jerry went below the chicken sitting on her nest to hide and get protection from Tom.

251 Breakdown of the events and causal links in this case is:

- 252 • Event A: Tom poses a threat to Jerry.
- 253 • Event B: Jerry seeks protection and safety.
- 254 • Event C: Jerry goes below the chicken sitting on her nest as a protective measure.

255 Here, we can identify that there are *two* causal links in the causal chain of the event.

## 256 A.11 Further details on Causal Chain Length Comparison Experiment

257 We leveraged GPT-4o [18] to compute the lengths of causal chains involved in the QA pairs from our  
258 and existing causal video QA datasets [19, 11, 13]. We randomly sampled 100 causal-Why QA pairs  
259 from all the datasets. Then, we used the following prompt: “What is the causal chain in the following  
260 question-answer pair? Please return the causal chain in the form of event\_A->event\_B->event\_C...If

Figure 4: **Examples of various types of reasoning required by our dataset.** Please zoom in & view in AdobeReader to play the embedded videos.

no cause-and-effect relationship is addressed, then output 0...Question: [question added here] Answer: [answer added here]." to ask GPT-4o to obtain the causal chain in each QA pair. We define the length of a causal chain as the number of links in that chain. For example, "event\_A->event\_B" has a length of 1, while "event\_A->event\_B->event\_C" has a length of 2. Since our dataset contains multi-level answers, we combined answers and explanations using GPT-4 to get an overall answer to reflect the true length of the full causal chain involved. We use these overall answers when computing the causal chains for our dataset. Extracted causal chains from all datasets were manually verified. Human verifiers agreed 89% of the times with the causal chains. Once the lengths of causal chains for all the samples are computed, we average them to get the average causal chain length for a dataset. We repeat the process for all datasets and then compare them.

## A.12 Details on Types of Reasoning

### A.12.1 Definitions of Types of Reasoning

In the following, we have provided the definitions of various types of reasoning.

1. **Deductive Reasoning** involves drawing specific conclusions based on general principles or premises. Questions from our dataset can require video understanding models to answer based on established patterns or cause-and-effect relationships between characters' actions (*e.g.*, Figure 4(a)).
2. **Inductive Reasoning** involves making generalizations or forming hypotheses based on specific observations. Tom and Jerry episodes contain such episode-specific actions or features or nuances, *e.g.*, as in Figure 4(b). Answering causal questions related to such actions involves inductive reasoning.
3. **Spatial Reasoning** involves predicting and understanding spatial relationships or configurations. Our dataset requires Video-QA models to have an understanding of the physical space and how the characters navigate it, interactions with the environment, including concepts such as distance, direction, and obstacles (crashing in or avoiding it). For example, as shown in Figure 4(c).
4. **Causal Reasoning** involves understanding cause-and-effect relationships between actions and their consequences. In the process of answering questions in our dataset, Video QA models will be required to engage in causal reasoning by linking the characters' actions or

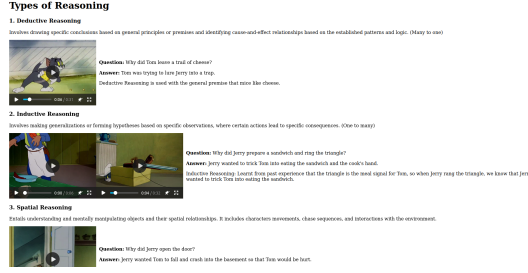

Figure 5: Screenshot of a guide used as a part to explain types of reasoning to human subjects.

sub-events within an episode to the resulting consequences and understanding the cause-and-effect chains in the cartoon as depicted in Figure 4(d).

5. **Critical Thinking** in our setting encompasses a range of cognitive processes, including analysis, and evaluation by analyzing the visual cues, and interpreting the characters' actions. A way to judge the complexity of critical thinking questions is by measuring the lengths of causal chains. To get the full picture, it is also important how difficult each link in this causal chain is to be inferred from the video (refer to Figure 4(e))
6. **Emotion Reasoning** involves recognition and understanding of emotions and how they can affect behavior and decision-making. Our dataset requires models to perform emotion/facial expression recognition and link them to characters' actions/behaviors. For example, as shown in Figure 4(f).
7. **Abductive reasoning** involves making an inference or hypothesis based on limited or incomplete information, in order to explain or interpret a situation or phenomenon. Our dataset contains questions that involve making inferences from partial information, *e.g.*, it is to be inferred that Tom was scared because there is a fight going on from the visual cues of furniture being thrown around, without seeing the actual fight as shown in Figure 4(f).
8. **Temporal Reasoning** refers to understanding and reasoning about the sequence/ordering of events over time—understanding the relationships between different actions, and identifying causal relationships amongst them (Why A is done before/after B) as in Figure 4(g).

## A.12.2 Human Study Details

Human subjects in human studies had a background in the disciplines of computer science and electrical engineering; from undergraduate student level to postdoctoral level. Five human subjects participated in the study. For determining reasoning types, the subjects were first explained reasoning types and given brief training on identifying those. A screenshot is shown in Figure 5. Subjects were then shown the question-answer pairs (unseen during the briefing) and asked to choose the reasoning types. Screenshots are shown in Figure 6, Figure 7. In the interface, all the reasoning types were listed out, and the subjects had the freedom to select multiple reasoning types if they thought an instance contained more than one type of reasoning. Additionally, a "No Reasoning Type" option was available to subjects in case they deemed that no reasoning was involved.

## A.13 Extended analysis of models' performance

In the main paper, we discussed two of the major limitations of VideoQA models. Other limitations include: 1) some models like MIST do not leverage explicit motion information using, *e.g.*, spatiotemporal convolutional neural networks. Due to this, they might inaccurately infer the scene based on a single static frame, instead of motion containing video clips. We believe these models can further improve their performance by incorporating explicit motion information. 2) Our CausalChaos dataset introduces the challenge of reasoning by linking scenes/shots. This is different from traditional temporal modeling, which is done within a scene. Scenes/shots involve an abrupt change in the scene. Traditional temporal modeling typically is geared toward smoother transitions; abrupt changes violate this condition. So while traditional temporal modeling does aid on our dataset, abrupt scene changes in our dataset poses a further challenge for VideoQA models which is not adequately addressed by traditional temporal models like 3DCNN feature extractors. We evaluated BLIP-2, VideoLLaMA and

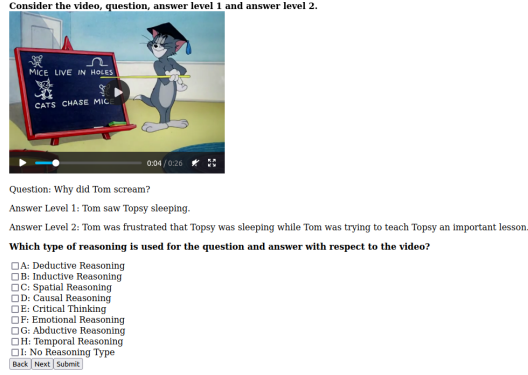

Figure 6: Screenshot of user interface used for collecting responses from human subjects for CausalChaos! dataset.

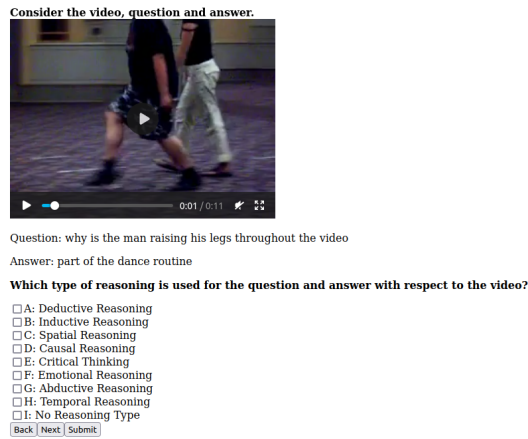

Figure 7: Screenshot of user interface used for collecting responses from human subjects for NextQA dataset.

331 VideoChat2 on MCQA and Open-Ended Answer Generation (OEAG) task. We noticed that BLIP-2  
 332 model performed better on MCQA, while VideoChat2 and VideoLLaMA performed better on OEAG  
 333 task. Notably, OEAG requires better language modeling than that required in MCQA task.

334 **Qualitative results.** We have provided the qualitative analysis of models’ failure cases in the  
 335 [accompanying PowerPoint presentation](#) for the following tasks/cases:

- 336 1. **Multi-Choice Question Answering (MCQA)**
- 337 2. **Open-Ended Answer Generation (OEAG)**
- 338 3. **Incorporating our data into real-world Video QA**

339 **Full results on OEAG** are presented in [Table 1](#).

#### 340 A.14 Discussion on cartoon physics

341 Cartoon physics often operates within its own set of rules and logic, which may differ from real-world  
 342 physics but still maintain consistency within the cartoon’s universe. These rules might include  
 343 exaggerated movements, gravity-defying actions, and other fantastical elements that wouldn’t occur  
 344 in reality but are accepted within the context of the cartoon world. Despite the departure from  
 345 real-world physics, there is often an internal consistency to how these cartoon physics operate within  
 346 their respective universes.



| Model            | BLEU-1 |        | BLEU-2 |        | BLEU-3 |        | METEOR |        | ROUGE  |        | SPICE  |        | CIDEr  |        | S-BERT |        | CapsMIX |
|------------------|--------|--------|--------|--------|--------|--------|--------|--------|--------|--------|--------|--------|--------|--------|--------|--------|---------|
|                  | A      | E      | A      | E      | A      | E      | A      | E      | A      | E      | A      | E      | A      | E      | A      | E      |         |
| BlindQA [1]      | 0.2412 | 0.1912 | 0.1039 | 0.0618 | 0.0415 | 0.0221 | 0.1243 | 0.0891 | 0.2732 | 0.1885 | 0.2956 | 0.0703 | 0.1034 | 0.0403 | 0.4987 | 0.4195 | 2.7646  |
| UATT [21]        | 0.2661 | 0.2203 | 0.1257 | 0.0805 | 0.0575 | 0.0330 | 0.1409 | 0.1046 | 0.3171 | 0.2293 | 0.3547 | 0.2775 | 0.1197 | 0.0397 | 0.5495 | 0.4767 | 3.3928  |
| HME [2]          | 0.2650 | 0.2072 | 0.1301 | 0.0713 | 0.0554 | 0.0219 | 0.1504 | 0.0914 | 0.3125 | 0.2273 | 0.3184 | 0.0826 | 0.0936 | 0.0639 | 0.5328 | 0.4737 | 3.0975  |
| HGA [9]          | 0.2891 | 0.2263 | 0.1588 | 0.0897 | 0.0789 | 0.0323 | 0.1856 | 0.1130 | 0.3388 | 0.2399 | 0.3980 | 0.2426 | 0.2782 | 0.0573 | 0.6026 | 0.4561 | 3.7872  |
| BlindGPT-2       | 0.3770 | 0.3165 | 0.2530 | 0.1749 | 0.1632 | 0.1091 | 0.2452 | 0.1761 | 0.3858 | 0.2966 | 0.4305 | 0.3529 | 1.2482 | 0.7690 | 0.6755 | 0.6271 | 6.6006  |
| VisionGPT-2      | 0.3878 | 0.3095 | 0.2605 | 0.1727 | 0.1738 | 0.1091 | 0.2560 | 0.1756 | 0.3934 | 0.2941 | 0.4498 | 0.3385 | 1.3725 | 0.7539 | 0.6760 | 0.6350 | 6.7582  |
| BLIP-2 [12]      | 0.1381 | 0.0815 | 0.0451 | 0.0256 | 0.0167 | 0.0059 | 0.0664 | 0.0480 | 0.1618 | 0.1312 | 0.0530 | 0.0422 | 0.2279 | 0.1046 | 0.3837 | 0.3614 | 1.8931  |
| Video-LLaMA [25] | 0.1241 | 0.1181 | 0.0419 | 0.0344 | 0.0115 | 0.0098 | 0.1477 | 0.1163 | 0.1719 | 0.1435 | 0.2055 | 0.1383 | 0.0836 | 0.0430 | 0.5734 | 0.4834 | 2.4464  |
| VideoChat2 [14]  | 0.2353 | 0.2116 | 0.0823 | 0.0776 | 0.0250 | 0.0253 | 0.1769 | 0.1295 | 0.2667 | 0.2168 | 0.3264 | 0.2547 | 0.3980 | 0.2910 | 0.6445 | 0.5908 | 3.9524  |

(a)

| Model       | BLEU-1 |        | BLEU-2 |        | BLEU-3 |        | METEOR |        | ROUGE  |        | SPICE  |        | CIDEr  |        | S-BERT |        | CapsMIX |
|-------------|--------|--------|--------|--------|--------|--------|--------|--------|--------|--------|--------|--------|--------|--------|--------|--------|---------|
|             | A      | E      | A      | E      | A      | E      | A      | E      | A      | E      | A      | E      | A      | E      | A      | E      |         |
| BlindQA [1] | 0.2193 | 0.1795 | 0.0772 | 0.0468 | 0.0326 | 0.0149 | 0.1122 | 0.0813 | 0.2501 | 0.1767 | 0.2960 | 0.1147 | 0.1099 | 0.0434 | 0.5129 | 0.4260 | 2.6935  |
| UATT [21]   | 0.2693 | 0.1947 | 0.1257 | 0.0581 | 0.0440 | 0.0146 | 0.1466 | 0.0847 | 0.3226 | 0.2107 | 0.3255 | 0.2012 | 0.1444 | 0.0646 | 0.5364 | 0.4829 | 3.2260  |
| HME [2]     | 0.2475 | 0.1830 | 0.1031 | 0.0549 | 0.0363 | 0.0154 | 0.1417 | 0.0845 | 0.2820 | 0.2173 | 0.2933 | 0.2549 | 0.0831 | 0.0655 | 0.5165 | 0.4929 | 3.0719  |
| HGA [9]     | 0.2586 | 0.1842 | 0.1085 | 0.0517 | 0.0365 | 0.0148 | 0.1433 | 0.0932 | 0.2909 | 0.1806 | 0.2908 | 0.2128 | 0.0877 | 0.0266 | 0.5231 | 0.4078 | 2.9111  |

(b)

| Model       | BLEU-1 |        | BLEU-2 |        | BLEU-3 |        | METEOR |        | ROUGE  |        | SPICE  |        | CIDEr  |        | S-BERT |        | CapsMIX |
|-------------|--------|--------|--------|--------|--------|--------|--------|--------|--------|--------|--------|--------|--------|--------|--------|--------|---------|
|             | A      | E      | A      | E      | A      | E      | A      | E      | A      | E      | A      | E      | A      | E      | A      | E      |         |
| BlindQA [1] | 0.2312 | 0.1847 | 0.0869 | 0.0550 | 0.0319 | 0.0198 | 0.1263 | 0.0930 | 0.2519 | 0.1806 | 0.2758 | 0.2447 | 0.0667 | 0.0265 | 0.4844 | 0.4153 | 2.7747  |
| UATT [21]   | 0.2659 | 0.1936 | 0.1180 | 0.0645 | 0.0548 | 0.0223 | 0.1423 | 0.0868 | 0.3025 | 0.2200 | 0.3449 | 0.2595 | 0.0940 | 0.0713 | 0.5447 | 0.4750 | 3.2601  |
| HME [2]     | 0.2640 | 0.1930 | 0.1238 | 0.0644 | 0.0556 | 0.0239 | 0.1457 | 0.0868 | 0.2998 | 0.2155 | 0.3115 | 0.1623 | 0.0944 | 0.0698 | 0.5341 | 0.4761 | 3.1207  |
| HGA [9]     | 0.2674 | 0.2293 | 0.1337 | 0.0823 | 0.0620 | 0.0308 | 0.1703 | 0.1123 | 0.3186 | 0.2363 | 0.3734 | 0.2558 | 0.1972 | 0.0477 | 0.5765 | 0.4692 | 3.5628  |

(c)

Table 1: OEAG Results on our dataset. (a) UD split; (b) PS split; (c) UN split.

Despite the departure from real-world physics, humans/video understanding models can apply causal reasoning within the context of cartoon physics to predict the consequences of characters' actions. For example, if a character steps off a cliff, humans expect them to fall downwards due to gravity, even if the fall is exaggerated or prolonged for comedic effect. This consistency can allow video-understanding models to anticipate and understand the outcomes of actions within the cartoon world, facilitating their ability to follow the storyline and engage with the humor and narrative.

Furthermore, the consistency of cartoon physics enables humans to make logical connections between different events and understand the progression of the story. By recognizing patterns and understanding how actions lead to specific outcomes, video understanding models can engage in causal reasoning to predict future events and comprehend the logic of the cartoon universe.

## A.15 CausalConfusion incorrect/negative answer generation

Samples from the dataset created using Vanilla Hard Negative mining:

Q: Why did Tom dip his fingers in the ink?

Correct A: To draw a mouse hole on the wall.

Incorrect A(1): Tom wanted Jerry to mistake Tom's finger for a sausage.

Incorrect A(2): Tom was preparing to eat.

Incorrect A(3): Tom wanted to see if there was ink in the pen.

Incorrect A(4): Tom's hand was in pain.

Correct E: Tom was trying to trick Jerry by drawing a fake mouse hole on the wall.

Incorrect E(1): Tom's hand was in pain from hitting Jerry with the vase.

Incorrect E(2): Tom was excited to eat Jerry who was on Tom's plate.

Incorrect E(3): Tom thought there was no ink in the pen as the ink did not come out when Jerry pulled the pen.

Incorrect E(4): Tom wanted to trick Jerry to mistake Tom's finger for a sausage so that Tom could catch Jerry when Jerry tried to steal Tom's finger.

Q: Why did Tom climb onto the gate?

Correct A: The bull was charging towards Tom.

Incorrect A(1): Tom was trying to get away from Spike.

Incorrect A(2): Tom wanted to get to a higher point on the tree.

Incorrect A(3): because Tom heard barking sounds and was scared.

Incorrect A(4): Tom was trying to get away from Spike and Tyke.

Correct E: The bull was charging towards Tom so Tom climbed onto the gate to avoid getting hurt by the bull.

Incorrect E(1): because Jerry imitated Spike to bark at Tom to scare Tom into climbing up the tree.

Incorrect E(2): Tom was scared of Spike who was chasing Tom and climbed up the tree to get away from Spike.

Incorrect E(3): Tom was dressed as a bird and wanted to climb higher on a tree to take off.

Incorrect E(4): Tom saw Spike and saw Tyke barking and wanted to get away from them.

359 Examples of Vanilla Hard Negatives vs. *CausalConfusion* Negatives:

Q: Why did Tom dip his fingers in the ink?

Correct A: To draw a mouse hole on the wall.

**Vanilla Hard Negatives**

Incorrect A(1): Tom wanted Jerry to mistake Tom's finger for a sausage.

Incorrect A(2): Tom was preparing to eat.

Incorrect A(3): Tom wanted to see if there was ink in the pen.

Incorrect A(4): Tom's hand was in pain.

**CausalConfusion version**

Incorrect A(1): To not draw a mouse hole on the wall.

Incorrect A(2): Tom was preparing to eat.

Incorrect A(3): Tom wanted to see if there was ink in the pen.

Incorrect A(4): Tom's hand was in pain.

Q: Why did Tom climb onto the gate?

Correct A: The bull was charging towards Tom.

**Vanilla Hard Negatives**

Incorrect A(1): Tom was trying to get away from Spike.

Incorrect A(2): Tom wanted to get to a higher point on the tree.

Incorrect A(3): because Tom heard barking sounds and was scared.

Incorrect A(4): Tom was trying to get away from Spike and Tyke.

**CausalConfusion version**

Incorrect A(1): The bull was not charging towards Tom.

Incorrect A(2): Tom was charging towards the bull.

Incorrect A(3): because Tom heard barking sounds and was scared.

Incorrect A(4): Tom was trying to get away from Spike and Tyke.

360 **A.16 CapsMIX extended details**

361 However, we note that with such a wide range of metrics, it is difficult to get a comprehensive  
362 insight into models' performances & compare them. To address that, we introduce a comprehensive

metric, termed Caps-MIX (Captioning Metrics Integration eXpert), which integrates all the previously mentioned scores after normalizing them to their theoretical best values. This 1) makes it easier to compare models using a single number and 2) combines the characteristics of individual metrics, each measuring performance from a unique perspective. We avoid using the WUPS score [16], as it is designed for single-word answers and is not suitable for our dataset’s detailed responses.

### A.17 Negative societal impact

While our dataset has a positive attribute of being synthetic in nature. And as such, we do not suggest deploying models trained on our dataset in real-world applications. Causal reasoning models trained on real-world data can potentially be used to find out or estimate why people carried out actions. This, in-turn, can be used to deduce further actionable insights into people’s behavior. This might justifiably be seen as an intrusion of privacy, especially, without consent. Thus, such systems shall not be deployed/used without the consent of all the parties involved. We suggest that this space should be regularized by governing bodies, and consent from the end-users, and parties being monitored is inevitable.

### A.18 Compute details

We used machine with following specifications: Intel(R) Xeon(R) W-2245 CPU@3.90GHz; 64GB RAM; 2x Nvidia A5000 24GB.

### A.19 Link to Dataset

We have included the following dataset files in the supplementary.

1. File containing all the annotations
2. Vanilla hard negative sets
3. CausalConfusion set

The dataset files are also publicly available at: <https://github.com/LUNAProject22/CausalChaos>.

## References

- [1] Stanislaw Antol, Aishwarya Agrawal, Jiasen Lu, Margaret Mitchell, Dhruv Batra, C Lawrence Zitnick, and Devi Parikh. Vqa: Visual question answering. In *Proceedings of the IEEE international conference on computer vision*, pages 2425–2433, 2015. 3, 11
- [2] Chenyou Fan, Xiaofan Zhang, Shu Zhang, Wensheng Wang, Chi Zhang, and Heng Huang. Heterogeneous memory enhanced multimodal attention model for video question answering. In *Proceedings of the IEEE/CVF conference on computer vision and pattern recognition*, pages 1999–2007, 2019. 3, 11
- [3] Difei Gao, Luowei Zhou, Lei Ji, Linchao Zhu, Yi Yang, and Mike Zheng Shou. Mist: Multi-modal iterative spatial-temporal transformer for long-form video question answering. In *Proceedings of the IEEE/CVF Conference on Computer Vision and Pattern Recognition*, pages 14773–14783, 2023. 3
- [4] Jiyang Gao, Runzhou Ge, Kan Chen, and Ram Nevatia. Motion-appearance co-memory networks for video question answering. In *Proceedings of the IEEE Conference on Computer Vision and Pattern Recognition*, pages 6576–6585, 2018. 3
- [5] Madeleine Grunde-McLaughlin, Ranjay Krishna, and Maneesh Agrawala. Agqa: A benchmark for compositional spatio-temporal reasoning. In *Proceedings of the IEEE/CVF Conference on Computer Vision and Pattern Recognition*, pages 11287–11297, 2021. 2
- [6] Sergio Guadarrama, Niveda Krishnamoorthy, Girish Malkarnenkar, Subhashini Venugopalan, Raymond Mooney, Trevor Darrell, and Kate Saenko. Youtube2text: Recognizing and describing arbitrary activities using semantic hierarchies and zero-shot recognition. In *Proceedings of the IEEE international conference on computer vision*, pages 2712–2719, 2013. 2
- [7] Yunseok Jang, Yale Song, Youngjae Yu, Youngjin Kim, and Gunhee Kim. Tgif-qa: Toward spatio-temporal reasoning in visual question answering. In *Proceedings of the IEEE conference on computer vision and pattern recognition*, pages 2758–2766, 2017. 2, 3

- [8] Yunseok Jang, Yale Song, Chris Dongjoo Kim, Youngjae Yu, Youngjin Kim, and Gunhee Kim. Video question answering with spatio-temporal reasoning. *International Journal of Computer Vision*, 127: 1385–1412, 2019. 2
- [9] Pin Jiang and Yahong Han. Reasoning with heterogeneous graph alignment for video question answering. In *Proceedings of the AAAI Conference on Artificial Intelligence*, pages 11109–11116, 2020. 3, 11
- [10] Thao Minh Le, Vuong Le, Svetha Venkatesh, and Truyen Tran. Hierarchical conditional relation networks for video question answering. In *Proceedings of the IEEE/CVF conference on computer vision and pattern recognition*, pages 9972–9981, 2020. 3
- [11] Jiangtong Li, Li Niu, and Liqing Zhang. From representation to reasoning: Towards both evidence and commonsense reasoning for video question-answering. In *Proceedings of the IEEE/CVF Conference on Computer Vision and Pattern Recognition (CVPR)*, 2022. 2, 7
- [12] Junnan Li, Dongxu Li, Silvio Savarese, and Steven Hoi. BLIP-2: bootstrapping language-image pre-training with frozen image encoders and large language models. In *ICML*, 2023. 11
- [13] Jiapeng Li, Ping Wei, Wenjuan Han, and Lifeng Fan. Intentqa: Context-aware video intent reasoning. In *Proceedings of the IEEE/CVF International Conference on Computer Vision (ICCV)*, pages 11963–11974, 2023. 2, 7
- [14] Kunchang Li, Yali Wang, Yinan He, Yizhuo Li, Yi Wang, Yi Liu, Zun Wang, Jilan Xu, Guo Chen, Ping Luo, et al. Mvbench: A comprehensive multi-modal video understanding benchmark. 2024. 11
- [15] Tegan Maharaj, Nicolas Ballas, Anna Rohrbach, Aaron Courville, and Christopher Pal. A dataset and exploration of models for understanding video data through fill-in-the-blank question-answering. In *Proceedings of the IEEE Conference on Computer Vision and Pattern Recognition*, pages 6884–6893, 2017. 2
- [16] Mateusz Malinowski and Mario Fritz. A multi-world approach to question answering about real-world scenes based on uncertain input. *Advances in neural information processing systems*, 27, 2014. 13
- [17] Jiayuan Mao, Xuelin Yang, Xikun Zhang, Noah Goodman, and Jiajun Wu. Clevrer-humans: Describing physical and causal events the human way. *Advances in Neural Information Processing Systems*, 35: 7755–7768, 2022. 2
- [18] OpenAI. Hello gpt-4o. <https://openai.com/index/hello-gpt-4o/>, 2024. [Online; accessed 31-May-2024]. 7
- [19] Junbin Xiao, Xindi Shang, Angela Yao, and Tat-Seng Chua. Next-qa: Next phase of question-answering to explaining temporal actions. In *Proceedings of the IEEE/CVF conference on computer vision and pattern recognition*, pages 9777–9786, 2021. 2, 7
- [20] Dejing Xu, Zhou Zhao, Jun Xiao, Fei Wu, Hanwang Zhang, Xiangnan He, and Yueting Zhuang. Video question answering via gradually refined attention over appearance and motion. In *Proceedings of the 25th ACM international conference on Multimedia*, pages 1645–1653, 2017. 2
- [21] Hongyang Xue, Zhou Zhao, and Deng Cai. Unifying the video and question attentions for open-ended video question answering. *IEEE Transactions on Image Processing*, 26(12):5656–5666, 2017. 11
- [22] Kexin Yi, Chuang Gan, Yunzhu Li, Pushmeet Kohli, Jiajun Wu, Antonio Torralba, and Joshua B Tenenbaum. Clevrer: Collision events for video representation and reasoning. *arXiv preprint arXiv:1910.01442*, 2019. 2
- [23] Zhou Yu, Dejing Xu, Jun Yu, Ting Yu, Zhou Zhao, Yueting Zhuang, and Dacheng Tao. Activitynet-qa: A dataset for understanding complex web videos via question answering. In *Proceedings of the AAAI Conference on Artificial Intelligence*, pages 9127–9134, 2019. 2
- [24] Amir Zadeh, Michael Chan, Paul Pu Liang, Edmund Tong, and Louis-Philippe Morency. Social-iq: A question answering benchmark for artificial social intelligence. In *Proceedings of the IEEE/CVF Conference on Computer Vision and Pattern Recognition*, pages 8807–8817, 2019. 2
- [25] Hang Zhang, Xin Li, and Lidong Bing. Video-LLaMA: An instruction-tuned audio-visual language model for video understanding. In *Proceedings of the 2023 Conference on Empirical Methods in Natural Language Processing: System Demonstrations*, pages 543–553, Singapore, 2023. Association for Computational Linguistics. 11
- [26] Linchao Zhu, Zhongwen Xu, Yi Yang, and Alexander G Hauptmann. Uncovering the temporal context for video question answering. *International Journal of Computer Vision*, 124:409–421, 2017. 2
